# Supplementary material
Source: PubMed Central journal article supplement (PMC6795293)
Supplement: jciinsight-4-128616-s011.pdf [file jciinsight-4-128616-s011.pdf]

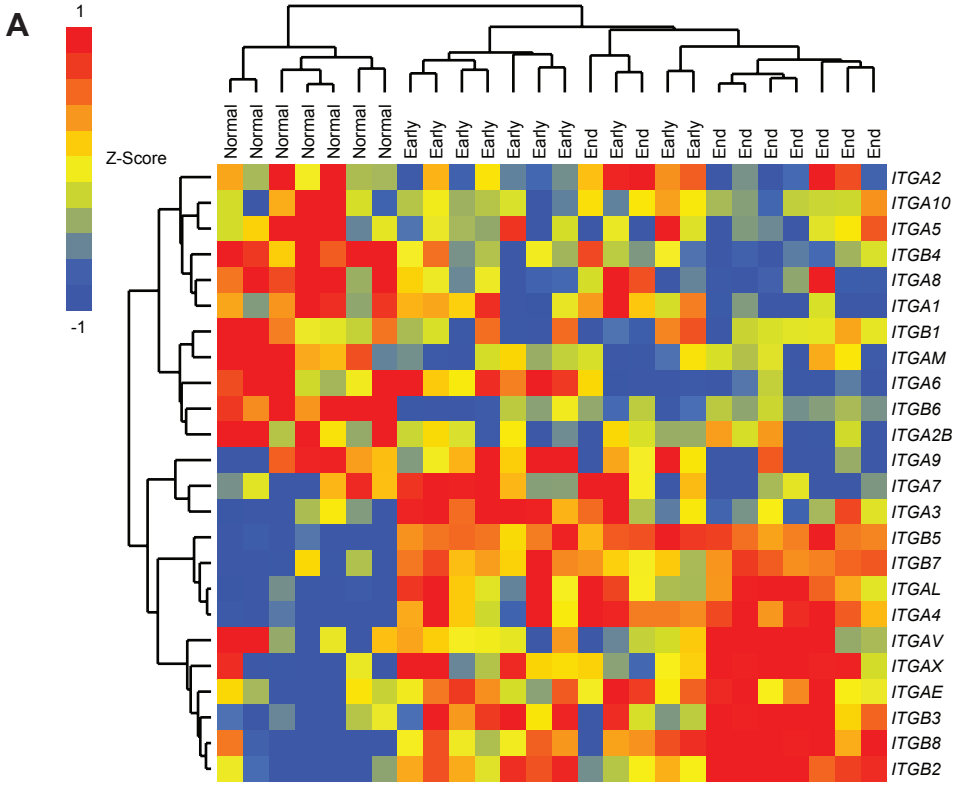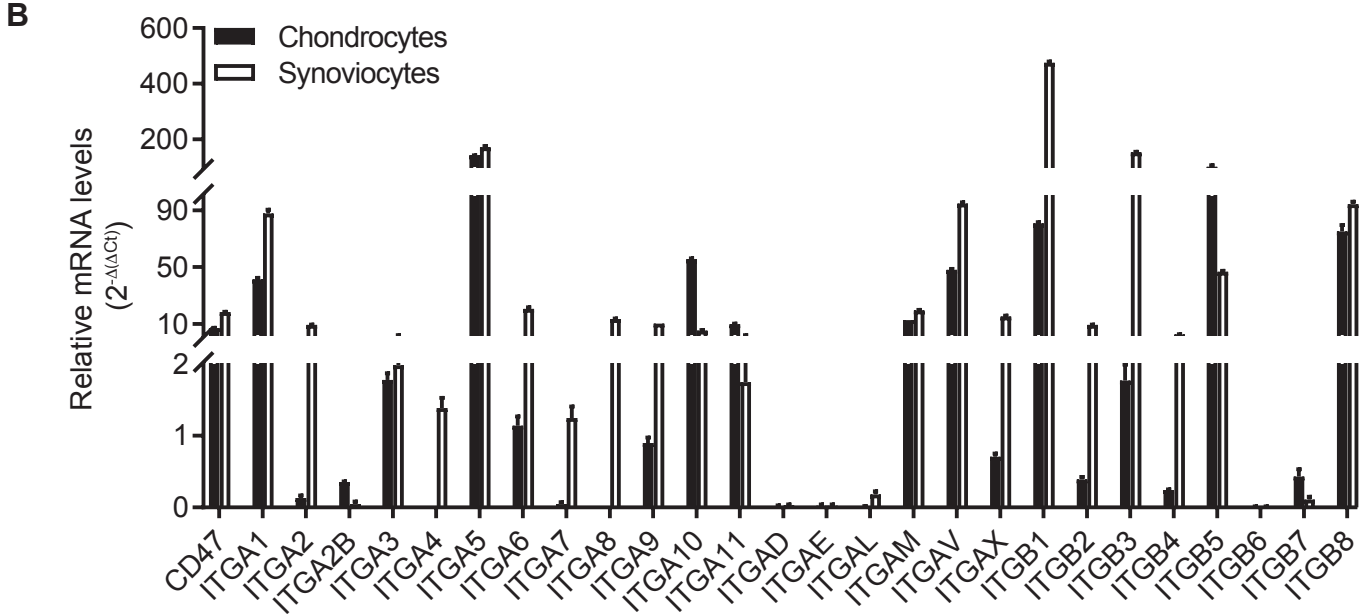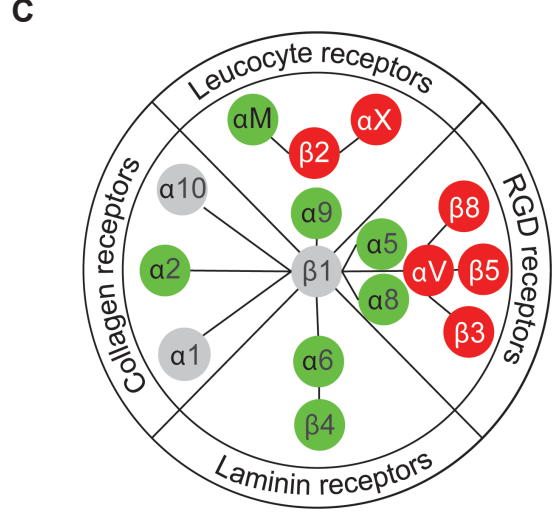

**A**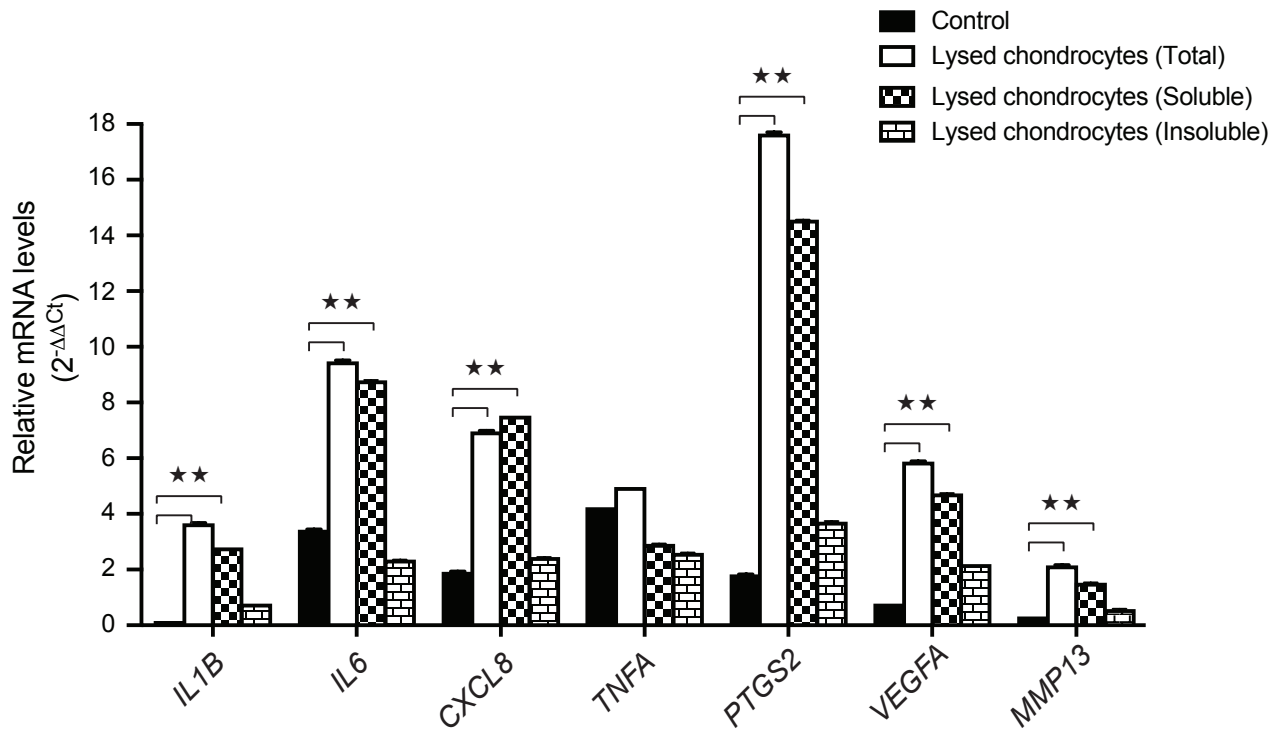**B**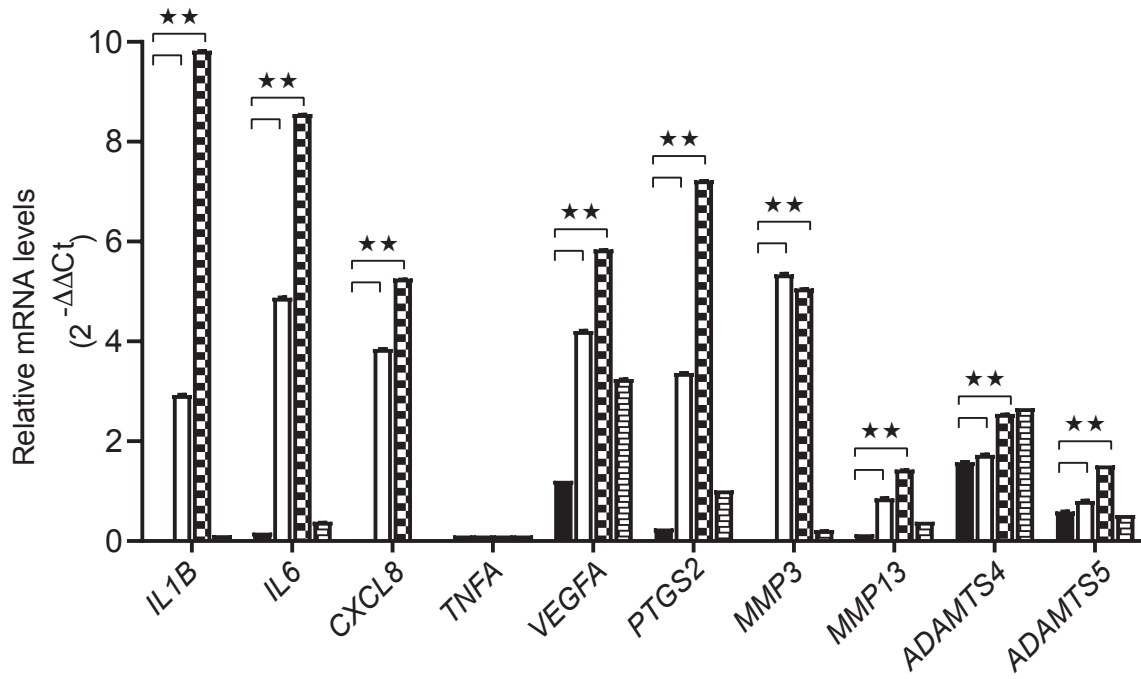

**Supplemental Figure 1. Comprehensive analysis of integrin expression in OA.** (A) Unsupervised hierarchical clustering of integrin subunit expression in microarray data sets on synovial membranes from healthy individuals (GEO accession #GSE12021) or those with early- or end-stage OA (GEO accession #GSE32317). Scale bar, z score. (B) qPCR analysis of relative mRNA expression in human OA primary chondrocytes and synoviocytes. Expression cutoff was set at  $Ct = 31$ ;  $Ct > 31$  was considered to be not expressed,  $Ct \leq 31$  was considered to be expressed. (C) Schematic of integrin expression in OA joints. Upregulated (Red) and downregulated (Green) integrin subunits were determined by transcriptional analysis in (A). Lines represent common integrin pairs. Image adapted from Morphic Therapeutic (60).

**Supplemental Figure 2. Soluble components of chondrocyte breakdown promote production of OA-related inflammatory and degradative mediators.** qPCR analysis of OA-related inflammatory and degradative mediators in human OA primary synoviocytes (**A**) and chondrocytes (**B**) stimulated with soluble components, insoluble components, or both soluble and insoluble components (Total) of breakdown products from lysed chondrocytes, derived from the knee joints of individuals with OA. Data are the mean  $\pm$  SEM of triplicates and are representative of two independent experiments. NS  $P > 0.01$ ,  $*P < 0.01$ ,  $**P < 0.001$  by Mann-Whitney  $U$  test with multiple comparison corrections.
